# Supplementary material for: miR-634 restores drug sensitivity in resistant ovarian cancer cells by targeting the Ras-MAPK pathway
Source: PubMed Central journal article supplement (PMC4650519; doi:10.1186/s12943-015-0464-4), 2015-11-17

## **Supplementary legends**

### **Supplementary table 1: Cisplatin sensitivity of cell lines**

**A:** The IC<sub>50</sub> values for cisplatin of ovarian cancer (A2780), colon cancer (HCT8) and bladder cancer (T24) cell line pairs were determined after 5 days of continuous exposure to cisplatin using an MTT assay. The IC<sub>50</sub> value was estimated based on viability data of three independent experiments. Each cell line pair consists of a parental sensitive cell line and a resistant derivative (DDP). The difference in IC<sub>50</sub> value between sensitive and resistant cell lines is comparable to previously published data (Goto *et al*, 1995; Kool *et al*, 1997; Kotoh *et al*, 1994; Schmidt and Chaney, 1993)

**B:** A2780, HCT8 and T24 cells and their resistant counterparts were treated with 100 µM cisplatin for 2 hours after which total cellular platinum levels were determined using Atomic Absorption Spectrophotometry. Indicated is the average and standard deviation of three biological replicates. Note that reduced cellular platinum levels are found in the cisplatin resistant cell lines.

**C:** The IC<sub>25</sub> values for cisplatin of ovarian cancer cell lines A2780, A2780 DDP, OAW42, OV56, TOV21G and TOV112D were determined in mock (Dharmafect 1 only) transfected cells. 48 hours after transfection, cisplatin was added and after 24 hours of continuous exposure an MTT assay was used to determine cell viability.

### **Supplementary table 2: miRNAs that show a ≥1.5 fold change of expression in cisplatin sensitive and resistant cell lines.**

miRNA expression was compared between sensitive and resistant ovarian cancer (A2780/A2780 DDP), colon cancer (HCT8/HCT8 DDP) and bladder cancer (T24/T24 DDP). Listed are all miRNAs that show a fold change ≥1.5 in the resistant cell line relative to its sensitive counterpart, as indicated by a red (expression is higher in the resistant cell line) or a green color (expression is lower in the resistant cell line).

**Supplementary table 3: GO-terms that are enriched for *miR-634* targets**

**Supplementary table 4: An overview of KEGG and Biocarta pathways that are enriched for *miR-634* targets.**

**Supplementary figure 1: *miR-634* is the only miRNA showing consistent changes in cisplatin sensitive and resistant cell lines.** miRNA expression was compared between sensitive and resistant ovarian cancer (A2780/A2780 DDP), colon cancer (HCT8/HCT8 DDP) and bladder cancer (T24/T24 DDP) using pairwise SAM analysis (FDR=0.000).

**Supplementary figure 2: Platinum levels in A2780 DDP cells transfected with *miR-634* or scrambled controls.** To investigate whether modulation of *miR-634* levels affect the cellular uptake of cisplatin in ovarian cancer cells A2780 DDP cells were transfected with scrambled miRNA (mneg) or *miR-634* mimic (m634). 48 hours after transfection, cells were treated with 80  $\mu$ M, 125  $\mu$ M cisplatin or no cisplatin. Cells were washed and harvested at 2H, 12H and 24H. Four biological replicates were pooled before protein content was measured and platinum levels were determined using Atomic Absorption Spectrophotometry. After 2 hours of cisplatin exposure no difference in intracellular platinum levels was observed between *miR-634* overexpressing A2780 DDP cells and control transfectants. Furthermore, at 6H and 12H of cisplatin exposure no consistent difference in platinum content between the *miR-634* and control transfected cells was detected.

**Supplementary figure 3: Immunohistochemical staining of primary ovarian cancer cell cultures.** Ovarian tumor cells were cultured from ascites fluid obtained from chemoresistant patients and stained for the epithelial markers EpCAM (aka BerEp4) and pan-Keratin, and the tumor-specific marker p53. The bar represents 100  $\mu$ m.

**Supplementary figure 4: *miR-634* enhances cisplatin sensitivity.** Depicted are the results for all ascites derived primary ovarian cell cultures. For each culture, a representative experiment is presented (A-B: culture 1-2, n=1; C-G: culture 3-7, n=3). \* =  $p < 0.05$ , \*\* =  $p < 0.01$ .

**Supplementary figure 5: *miR-634* enhances carboplatin sensitivity.** Depicted are the results of a representative experiment. Culture 3 (A): n=3, culture 4 (B): n=1, culture 5 (C): n=1, culture 7 (D): n=3.

**Supplementary figure 6: Predicted *miR-634* targets**

**A:** *MiR-634* is predicted to target several components of the Insulin signaling pathway (pink), the mTOR signaling pathway (blue) and the Ras-MAPK pathway (yellow). Predicted targets, INSR, IRS, PI3K, RICTOR, EIF4E, GRB2, N-RAS, RAF1, ERK2, RSK1 and RSK2 are marked by a star.

**B:** An overview of the 10 GO terms that are most enriched for putative *miR-634* targets. The red colors depict GO terms related to cell cycle regulation, the yellow colors GO terms related to regulation of proliferation. All other bars are blue.

**Supplementary figure 7: Overview of the location of the *miR-634* target sites in the 3'UTR of its potential target genes.**

**A:** Overview of the location of the cloned regions and the *miR-634* target sites within the 3'UTR of CCND1, GRB2, ERK2, RSK1 and RSK2

**B:** Overview of the *miR-634* target sites and primers used to clone the 3'UTR and to mutate the *miR-634* target site

**Supplementary figure 8: Effect of *miR-634* overexpression on luciferase activity of psiCHECK™-2 reporter constructs containing part of the 3'UTR of *miR-634* predicted targets.** A2780 DDP cells were transfected with a scrambled mimic or a *miR-634* mimic.

After 8 hours, the same cells were transfected with *Renilla* luciferase reporter constructs (psiCHECK™-2) containing 3'UTR regions of 500 bp surrounding the predicted miR-634 target sites of various target genes (Supplementary figure 7). *ERK2* and *RSK2* contain respectively three or two *miR-634* binding sites, and for each site the 3'UTR region surrounding the target site was cloned. The *Renilla* luciferase activity was measured and normalized using the Firefly luciferase activity. The relative luciferase activity of cells transfected with the empty vector (EV) was set at 1. Depicted are the average values  $\pm$  SD (n= 3).

**Supplementary figure 9: Effect of *miR-634* inhibitors on luciferase activity of psiCHECK™-2 reporter constructs containing part of the 3'UTR of *miR-634* predicted targets.** A2780 DDP cells were transfected with a scrambled inhibitor or a *miR-634* antisense inhibitor. After 8 hours, the same cells were transfected with *Renilla* luciferase constructs (psiCHECK™-2) containing 3'UTR regions of 500 bp surrounding the predicted *miR-634* target sites of various target genes (Supplementary figure 7). The *Renilla* luciferase activity was measured and normalized using the Firefly luciferase activity. The relative luciferase activity of cells transfected with the scrambled inhibitor was set at 1. Depicted are the average values  $\pm$  SD (n= 4).

**Supplementary figure 10: Correlation between *miR-634* expression and its target gene expression in 23 *miR-634* expressing primary ovarian cancer samples (TCGA dataset).** Spearman rank correlation tests were performed to assess the relation between *miR-634* expression (miRNA dataset) and target gene expression (mRNA dataset).

**Supplementary figure 11: Effect of PD0325901 on cell survival and cisplatin sensitivity**  
**A:** Treatment with the MEK inhibitor PD0325901 (1  $\mu$ M) decreases cell viability 48 H after treatment. Depicted is the average viability (n=2). Error bars represents the standard deviation.

**B:** Treatment with the MEK inhibitor PD0325901 augments cisplatin sensitivity. Cells were cotreated with the indicated amounts of cisplatin and 1  $\mu$ M PD0325901. After 24 H the cell viability was determined. Depicted is the average viability (n=2). Error bars represent the standard deviation.

### **Supplementary figure 12: Detection of miR-634, RNU43 and RNU48 by RT-PCR**

**A:** Detection of miR-634 by Taqman assay (ID # 001576; Applied Biosystems). No expression of miR-634 could be detected by RT-PCR in A2780 and A2780-ddp. In A2780-ddp transfected with a miR-634 mimic (A2780-ddp M634, n=3), miR-634 was readily detectable.

**B:** Detection of RNU43 and RNU 48 by Taqman assay (ID # 001095 and ID # 001006, respectively). Both RNU43 and RNU48 expression was detected at the expected levels in both A2780, A2780-ddp and A2780-ddp transfected with a miR-634 mimic.

### **References:**

Goto, S., Yoshida, K., Morikawa, T., Urata, Y., Suzuki, K., Kondo, T., 1995. Augmentation of transport for cisplatin-glutathione adduct in cisplatin-resistant cancer cells. *Cancer Res* 55, 4297-4301.

Kool, M., de Haas, M., Scheffer, G.L., Scheper, R.J., van Eijk, M.J., Juijn, J.A., Baas, F., Borst, P., 1997. Analysis of expression of cMOAT (MRP2), MRP3, MRP4, and MRP5, homologues of the multidrug resistance-associated protein gene (MRP1), in human cancer cell lines. *Cancer Res* 57, 3537-3547.

Kotoh, S., Naito, S., Yokomizo, A., Kumazawa, J., Asakuno, K., Kohno, K., Kuwano, M., 1994. Increased expression of DNA topoisomerase I gene and collateral sensitivity to camptothecin in human cisplatin-resistant bladder cancer cells. *Cancer Res* 54, 3248-3252.

Schmidt, W., Chaney, S.G., 1993. Role of carrier ligand in platinum resistance of human carcinoma cell lines. *Cancer Res* 53, 799-805.

## Supplementary table 1

A

**MTT assay (5 day cisplatin exposure)**

| Cell lines | IC <sub>50</sub> (μM) | Fold resistance |
|------------|-----------------------|-----------------|
| A2780      | 2.4                   |                 |
| A2780 DDP  | 17.9                  | 7.5             |
| HCT8       | 6.8                   |                 |
| HCT8 DDP   | 19.5                  | 2.9             |
| T24        | 1.4                   |                 |
| T24 DDP 10 | 12.0                  | 8.6             |

B

**Cisplatin levels (2 hour 100 μM cisplatin)**

| Cell lines | ng Pt/ μg Protein |
|------------|-------------------|
| A2780      | 73.9 ± 4.4        |
| A2780 DDP  | 41.8 ± 15.7       |
| HCT8       | 52.6 ± 14.6       |
| HCT8 DDP   | 30.2 ± 4.56       |
| T24        | 47.0 ± 7.5        |
| T24 DDP 10 | 38.3 ± 2.9        |

C

**MTT assay (24 hour exposure)**

| Cell lines | IC <sub>25</sub> (μM) |
|------------|-----------------------|
| A2780      | 10                    |
| A2780 DDP  | 80                    |
| OAW42      | 20                    |
| OV56       | 20                    |
| TOV21G     | 50                    |
| TOV112D    | 5                     |

Supplementary table 2

| Annotation                       | HCT8 | T24  | A2780 | Annotation         | HCT8  | T24  | A2780 |
|----------------------------------|------|------|-------|--------------------|-------|------|-------|
| hsa-miR-634                      | -1.5 | -2.8 | -1.5  | hsa-miR-628-3p     | -1.8  | 1.6  | 1     |
| hsa-miR-214                      | -1.3 | -1.6 | -2.1  | hsa-miR-31         | -1.7  | 2.2  | 1     |
| hsa-miR-10b                      | 1.2  | -1.5 | -2.9  | hsa-miR-340-star   | -1.5  | 2.7  | -1.1  |
| hsa-miR-493-star                 | 1    | -1.5 | -2.7  | hsa-miR-378        | -1.5  | 1.6  | 1     |
| hsa-miR-382                      | 1.3  | -2.2 | -1.5  | hsa-miR-636        | -1.5  | 1.5  | 1.1   |
| hsa-miR-23a                      | 1    | -1.8 | -1.5  | hsa-miR-886-3p     | -1.5  | 1.9  | 1     |
| hsa-let-7d                       | 1.2  | -1.5 | -1.6  | hsa-miR-141        | -1.9  | 1.1  | 7.8   |
| hsa-miR-19b                      | -1.8 | -1.1 | -3.3  | hsa-miR-518e       | -1.7  | -1.2 | 2.2   |
| hsa-miR-668                      | -1.5 | -1.2 | -1.5  | hsa-miR-497        | -1.6  | 1.1  | 1.6   |
| hsa-miR-18b                      | -1.6 | 1.1  | -4.4  | hsa-miR-190b       | -1.5  | -1.2 | 1.5   |
| hsa-miR-106a                     | -1.9 | 1.2  | -3.9  | hsa-miR-923        | -35.1 | 1.7  | 1.7   |
| hsa-miR-17                       | -1.7 | 1    | -3.6  | hsa-miR-215        | 2.3   | 2    | -8.1  |
| hsa-miR-19a                      | -2.1 | 1    | -2.5  | hsa-miR-433        | 1.7   | 1.8  | 1     |
| hsa-miR-186-star                 | -1.7 | 2.1  | -2.4  | hsa-miR-518a-3p    | 1.5   | -1.3 | 1.1   |
| hsa-miR-363-star                 | -1.5 | 1.6  | -1.7  | hsa-miR-197        | 1.5   | -1.2 | -1.1  |
| hsa-miR-510                      | -1.5 | -1.5 | 1.1   | hsa-miR-455-3p     | 1.5   | -1.2 | -1.1  |
| hsa-miR-16                       | -2.1 | 1.3  | -1.1  | hsa-miR-330-5p     | 1.5   | -1.2 | 1     |
| hsa-miR-130b                     | -2.0 | 1.1  | 1.1   | hsa-miR-34a        | 1.5   | -1.1 | 1     |
| hsa-miR-425-star                 | -1.9 | -1.4 | 1.1   | hsa-miR-220b       | 1.5   | 1    | 1     |
| hsa-miR-26a                      | -1.9 | 1.2  | 1.1   | hsa-miR-766        | 1.5   | 1    | 1     |
| hsa-miR-627                      | -1.9 | 1.3  | 1.3   | hsa-miR-622        | 1.5   | 1.2  | 1.2   |
| hsa-miR-320                      | -1.8 | -1.1 | 1.4   | hsa-miR-576-5p     | 1.6   | -1.3 | -1.3  |
| hsa-miR-10a-star                 | -1.8 | 1    | 1.1   | hsa-miR-374a-star  | 1.6   | -1.1 | -1.1  |
| hsa-miR-17-star                  | -1.7 | -1.3 | 1.1   | hsa-miR-921        | 1.6   | 1    | 1.2   |
| hsa-miR-183-star                 | -1.7 | -1.2 | 1.1   | hsa-miR-625-star   | 1.8   | -1.3 | -1.1  |
| hsa-miR-329                      | -1.7 | 1.1  | -1.1  | hsa-miR-148b-star  | 2     | -1.2 | -1.1  |
| hsa-miR-801                      | -1.6 | 1    | 1.3   | hsa-miR-708-star   | 2     | 1    | 1.2   |
| hsa-let-7c-star                  | -1.5 | 1.2  | 1.1   | hsa-miR-16-2-star  | 2.1   | 1.1  | 1     |
| hsa-miR-30c                      | -1.5 | 1.3  | 1     | hsa-miR-708        | -1.3  | 1.5  | 1.1   |
| hsa-miR-200b                     | -1.5 | 1.3  | 1.1   | hsa-miR-151-3p     | -1.1  | 1.5  | 1.1   |
| hsa-miR-181a-2-star              | -1.5 | 1.3  | 1.3   | hsa-miR-143        | 1.1   | 1.5  | 1.1   |
| hsa-miR-193a-3p                  | -1.5 | 1.4  | 1.3   | hsa-miR-324-3p     | 1.1   | 1.5  | 1.1   |
| hsa-miR-516a-5p                  | -1.1 | -3   | -1.1  | hsa-miR-637        | -1.4  | 1.5  | 1.2   |
| hsa-miR-302c-star                | 1    | -2.8 | 1     | hsa-miR-125a-5p    | -1.2  | 1.5  | 1.2   |
| hsa-miR-194-star                 | -1.2 | -2.6 | 1.3   | hsa-miR-935        | 1.1   | 1.5  | 1.2   |
| hsa-miR-493                      | 1    | -2.4 | -1.1  | hsa-miR-328        | 1.2   | 1.5  | 1.2   |
| hsa-miR-338-3p                   | 1.1  | -2.3 | 1.3   | hsa-miR-485-3p     | -1.2  | 1.6  | -1.1  |
| hsa-miR-501-5p                   | 1.2  | -1.9 | 1.2   | hsa-miR-181b       | 1.2   | 1.6  | 1     |
| hsa-miR-675                      | -1.2 | -1.8 | 1.3   | hsa-miR-193b       | -1.1  | 1.6  | 1.1   |
| hsa-miR-516b                     | -1.1 | -1.8 | 1.4   | hsa-miR-124-star   | 1.3   | 1.6  | 1.3   |
| hsa-miR-34c-5p                   | -1.1 | -1.7 | -1.1  | hsa-miR-18b-star   | 1     | 1.6  | 1.4   |
| hsa-miR-485-5p                   | 1    | -1.6 | -1.3  | hsa-miR-29a        | -1.2  | 1.7  | -1.3  |
| hsa-miR-520d-5p                  | 1.1  | -1.6 | -1.1  | hsa-miR-21         | 1.1   | 1.7  | -1.3  |
| hsa-miR-24-1-star                | 1    | -1.6 | 1     | hsa-miR-885-5p     | 1.2   | 1.7  | -1.1  |
| hsa-miR-520a-5p                  | 1.1  | -1.6 | 1     | hsa-miR-601        | 1.1   | 1.7  | 1.1   |
| hsa-miR-379                      | 1.2  | -1.6 | 1.1   | hsa-miR-130b-star  | 1.1   | 1.7  | 1.3   |
| hsa-miR-23b                      | 1.1  | -1.6 | 1.4   | hsa-miR-1          | -1.4  | 1.8  | 1.1   |
| hsa-miR-452                      | -1.2 | -1.5 | 1     | hsa-miR-659        | 1.2   | 1.8  | 1.3   |
| hsa-let-7b                       | -1.1 | -1.5 | 1     | hsa-miR-146a       | -1.1  | 1.8  | 1.4   |
| hsa-miR-10a                      | 1    | -1.5 | -1.1  | hsa-miR-576-3p     | -1.2  | 1.9  | 1.1   |
| hsa-miR-342-5p                   | -1.3 | -1.5 | 1.2   | hsa-miR-340        | 1.1   | 2    | 1.1   |
| hsa-miR-184                      | -1.2 | -1.5 | 1.2   | hsa-miR-580        | 1.1   | 2    | 1.1   |
| hsa-miR-155                      | -1.1 | -1.5 | 1.3   | hsa-miR-21-star    | 1.2   | 2    | 1.1   |
| hsa-miR-361-3p                   | 1.3  | -1.5 | -1.1  | hsa-miR-518b       | 1.2   | 2.1  | 1.4   |
| hsa-miR-532-3p                   | 1    | -1.5 | 1.2   | hsa-miR-488        | -1.1  | 2.2  | 1.2   |
| hsa-let-7b-star                  | 1.3  | -1.5 | 1     | hsa-miR-626        | -1.3  | 2.4  | 1.3   |
| hsa-miR-125b-2-star              | 1.2  | -1.5 | 1.1   | hsa-miR-135a       | 1.2   | 2.5  | -1.1  |
| hsa-miR-371-5p                   | 1    | -1.5 | 1.4   | hsa-miR-502-5p     | 1.1   | -1.4 | 1.6   |
| hsa-miR-199a-5p                  | 1    | 1.2  | -36.7 | hsa-miR-551b-star  | 1     | -1.2 | 1.6   |
| hsa-miR-199a-3p; hsa-miR-199b-3p | 1.3  | 1.4  | -18.3 | hsa-miR-885-3p     | 1.2   | -1.2 | 1.7   |
| hsa-miR-942                      | -1.2 | -1.1 | -12.3 | hsa-miR-210        | -1.1  | -1.2 | 1.9   |
| hsa-miR-335                      | -1.3 | 1.2  | -7.7  | hsa-miR-219-2-3p   | 1.1   | -1.1 | 1.5   |
| hsa-miR-20b                      | 1.1  | 1    | -4.2  | hsa-miR-575        | 1.1   | -1.1 | 1.5   |
| hsa-miR-412                      | 1    | 1.3  | -4    | hsa-miR-93         | -1.2  | -1.1 | 1.6   |
| hsa-miR-645                      | -1.1 | 1    | -3.3  | hsa-miR-106b-star  | -1.1  | -1.1 | 1.6   |
| hsa-miR-196a                     | -1.2 | 1    | -2.7  | hsa-miR-122-star   | -1.1  | -1.1 | 1.6   |
| hsa-miR-135b-star                | -1.2 | 1.1  | -2    | hsa-miR-608        | 1.1   | -1.1 | 1.7   |
| hsa-miR-130a                     | -1.2 | 1.3  | -2    | hsa-miR-610        | 1     | 1    | 1.5   |
| hsa-miR-338-5p                   | 1    | 1.2  | -2    | hsa-miR-632        | 1.2   | 1    | 1.5   |
| hsa-miR-29b                      | 1    | -1.3 | -1.9  | hsa-miR-377-star   | 1.1   | 1    | 1.6   |
| hsa-miR-18a                      | -1.2 | -1.4 | -1.7  | hsa-miR-132-star   | 1.2   | 1    | 1.6   |
| hsa-miR-20a                      | -1.4 | 1    | -1.7  | hsa-miR-526b-star  | -1.3  | 1.1  | 1.5   |
| hsa-miR-593-star                 | 1.1  | -1.1 | -1.7  | hsa-miR-491-5p     | -1.1  | 1.1  | 1.5   |
| hsa-miR-339-5p                   | 1    | 1.1  | -1.7  | hsa-miR-550-star   | -1.1  | 1.1  | 1.9   |
| hsa-miR-297                      | 1.4  | 1    | -1.7  | hsa-miR-499-3p     | -1.4  | 1.2  | 1.5   |
| hsa-miR-105                      | 1    | -1.4 | -1.5  | hsa-miR-220c       | -1.1  | 1.2  | 1.5   |
| hsa-miR-30c-2-star               | 1.2  | -1.4 | -1.5  | hsa-miR-200a       | -1.3  | 1.2  | 1.6   |
| hsa-miR-141-star                 | -1.3 | 1.4  | -1.5  | hsa-miR-615-5p     | 1.3   | 1.2  | 1.7   |
| hsa-miR-513a-5p                  | 1.2  | -1.1 | -1.5  | hsa-miR-936        | 1.4   | 1.2  | 1.9   |
| hsa-miR-191                      | -1.2 | 1.4  | -1.5  | hsa-miR-222        | 1     | 1.4  | 2     |
| hsa-miR-886-5p                   | -1.1 | 1.3  | -1.5  | hsa-miR-365        | 1.2   | 1.4  | 2     |
| hsa-miR-647                      | 1.3  | 1.1  | -1.5  | hsa-miR-631        | -1.1  | 1.4  | 2.1   |
| hsa-miR-542-3p                   | -1.2 | 2    | -1.6  | hsa-miR-200c       | -1.4  | 1.4  | 2.6   |
| hsa-miR-300                      | -1.3 | 2.5  | -1.6  | hsa-miR-424-star   | 1.6   | -1.2 | 1.5   |
| hsa-miR-421                      | 1.1  | 1.9  | -2.3  | hsa-miR-29b-2-star | 1.6   | 1.4  | 1.5   |
| hsa-miR-92a-2-star               | 2.1  | 1.2  | -1.5  | hsa-miR-106b       | -1.4  | 1.6  | 1.6   |
| hsa-miR-449a                     | 1.6  | -1.4 | -1.6  | hsa-miR-182        | -1.2  | 1.9  | 1.6   |
| hsa-miR-522                      | 1.6  | -1.6 | -1.2  | hsa-miR-203        | -1.3  | 1.9  | 1.7   |
| hsa-miR-22                       | -2.3 | 1.6  | 1.1   | hsa-miR-144-star   | -1.3  | 3    | 2.2   |

Suocematory table 3

Table with columns: Category, Term, Count, P, PValue, Pathway, mR64 targets, List, LSet, Pop, Hb, Pop Tot, Full Entic, Bonferroni, Benjamini, FDR. Contains a large list of biological processes and pathways such as regulation of cytokinesis, cell cycle, and cell differentiation.



## Supplementary table 4

| <b>Enriched BIOCARTA pathways</b>                                                 | Count | %   | p-value  | Benjamini |
|-----------------------------------------------------------------------------------|-------|-----|----------|-----------|
| MAPKinase Signaling Pathway                                                       | 8     | 2.8 | 3.90E-03 | 4.00E-01  |
| p38 MAPK Signaling Pathway                                                        | 5     | 1.7 | 9.80E-03 | 4.80E-01  |
| Links between Pyk2 and Map Kinases                                                | 4     | 1.4 | 2.90E-02 | 7.30E-01  |
| Angiotensin II mediated activation of JNK Pathway via Pyk2 dependent signaling    | 4     | 1.4 | 3.20E-02 | 6.60E-01  |
| Fc Epsilon Receptor I Signaling in Mast Cells                                     | 4     | 1.4 | 4.20E-02 | 6.80E-01  |
| Synaptic Proteins at the Synaptic Junction                                        | 3     | 1   | 8.00E-02 | 8.40E-01  |
| Multiple antiapoptotic pathways from IGF-1R signaling lead to BAD phosphorylation | 3     | 1   | 8.00E-02 | 8.40E-01  |
| Insulin Signaling Pathway                                                         | 3     | 1   | 8.80E-02 | 8.20E-01  |
| <b>Enriched KEGG pathways</b>                                                     | Count | %   | p-value  | Benjamini |
| Long-term potentiation                                                            | 9     | 3.1 | 3.20E-05 | 3.30E-03  |
| GnRH signaling pathway                                                            | 10    | 3.5 | 7.60E-05 | 3.90E-03  |
| Neurotrophin signaling pathway                                                    | 11    | 3.8 | 9.00E-05 | 3.10E-03  |
| Insulin signaling pathway                                                         | 11    | 3.8 | 1.80E-04 | 4.70E-03  |
| Oocyte meiosis                                                                    | 10    | 3.5 | 1.90E-04 | 3.80E-03  |
| MAPK signaling pathway                                                            | 15    | 5.2 | 3.80E-04 | 6.50E-03  |
| Chronic myeloid leukemia                                                          | 8     | 2.8 | 4.50E-04 | 6.60E-03  |
| Non-small cell lung cancer                                                        | 7     | 2.4 | 4.50E-04 | 5.80E-03  |
| Glioma                                                                            | 7     | 2.4 | 1.00E-03 | 1.20E-02  |
| B cell receptor signaling pathway                                                 | 7     | 2.4 | 2.60E-03 | 2.60E-02  |
| Endometrial cancer                                                                | 6     | 2.1 | 2.70E-03 | 2.50E-02  |
| Pathways in cancer                                                                | 15    | 5.2 | 2.80E-03 | 2.40E-02  |
| Fc epsilon RI signaling pathway                                                   | 7     | 2.4 | 3.20E-03 | 2.50E-02  |
| Acute myeloid leukemia                                                            | 6     | 2.1 | 4.30E-03 | 3.10E-02  |
| Colorectal cancer                                                                 | 7     | 2.4 | 4.60E-03 | 3.10E-02  |
| ErbB signaling pathway                                                            | 7     | 2.4 | 5.40E-03 | 3.40E-02  |
| Aldosterone-regulated sodium reabsorption                                         | 5     | 1.7 | 6.80E-03 | 4.10E-02  |
| Endocytosis                                                                       | 10    | 3.5 | 7.00E-03 | 4.00E-02  |
| Fc gamma R-mediated phagocytosis                                                  | 7     | 2.4 | 8.30E-03 | 4.40E-02  |
| Melanogenesis                                                                     | 7     | 2.4 | 1.00E-02 | 5.10E-02  |
| Adherens junction                                                                 | 6     | 2.1 | 1.40E-02 | 6.70E-02  |
| mTOR signaling pathway                                                            | 5     | 1.7 | 1.60E-02 | 7.10E-02  |
| Thyroid cancer                                                                    | 4     | 1.4 | 1.60E-02 | 7.10E-02  |
| Vascular smooth muscle contraction                                                | 7     | 2.4 | 1.80E-02 | 7.40E-02  |
| Progesterone-mediated oocyte maturation                                           | 6     | 2.1 | 2.20E-02 | 8.60E-02  |
| Gap junction                                                                      | 6     | 2.1 | 2.50E-02 | 9.50E-02  |
| Prostate cancer                                                                   | 6     | 2.1 | 2.50E-02 | 9.50E-02  |
| Jak-STAT signaling pathway                                                        | 8     | 2.8 | 2.50E-02 | 9.20E-02  |
| Renal cell carcinoma                                                              | 5     | 1.7 | 4.10E-02 | 1.40E-01  |
| Pancreatic cancer                                                                 | 5     | 1.7 | 4.50E-02 | 1.50E-01  |
| Regulation of actin cytoskeleton                                                  | 9     | 3.1 | 4.70E-02 | 1.50E-01  |
| T cell receptor signaling pathway                                                 | 6     | 2.1 | 5.10E-02 | 1.60E-01  |
| VEGF signaling pathway                                                            | 5     | 1.7 | 5.10E-02 | 1.50E-01  |
| Notch signaling pathway                                                           | 4     | 1.4 | 5.70E-02 | 1.70E-01  |
| Type II diabetes mellitus                                                         | 4     | 1.4 | 5.70E-02 | 1.70E-01  |
| Wnt signaling pathway                                                             | 7     | 2.4 | 6.20E-02 | 1.80E-01  |
| Dorso-ventral axis formation                                                      | 3     | 1   | 7.80E-02 | 2.10E-01  |
| Focal adhesion                                                                    | 8     | 2.8 | 8.10E-02 | 2.10E-01  |
| RNA degradation                                                                   | 4     | 1.4 | 9.00E-02 | 2.30E-01  |

Supplementary figure 1

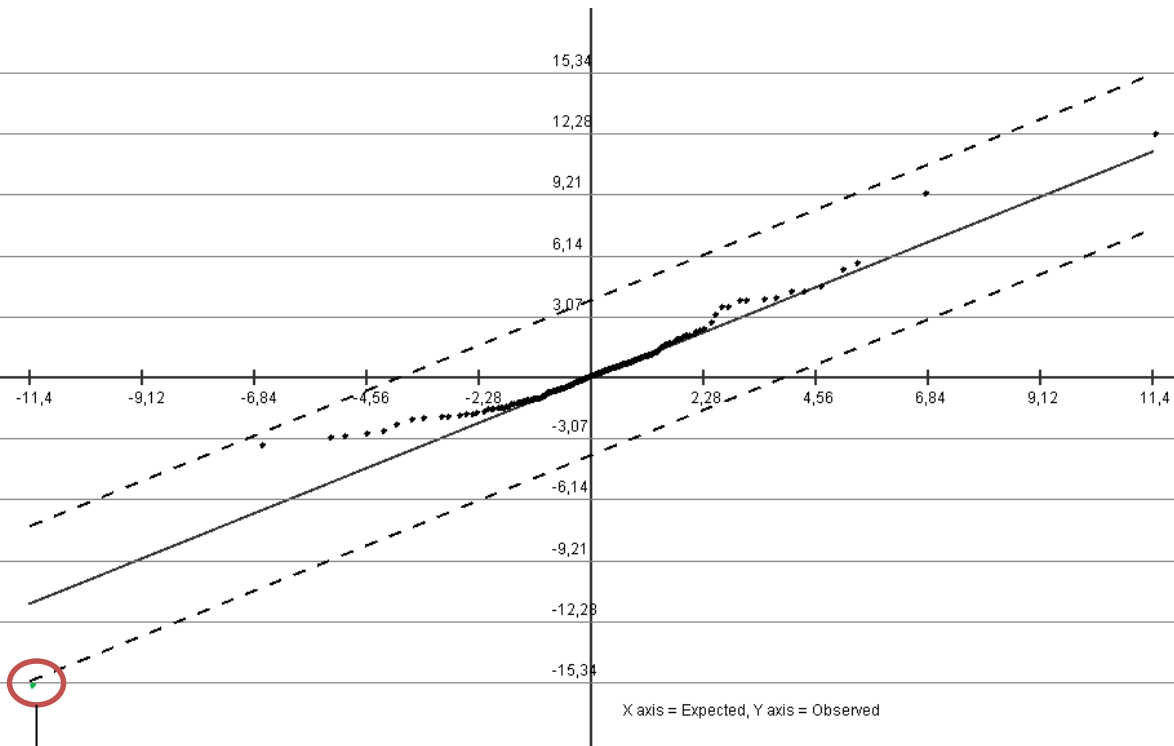

miR-634

Supplementary figure 2

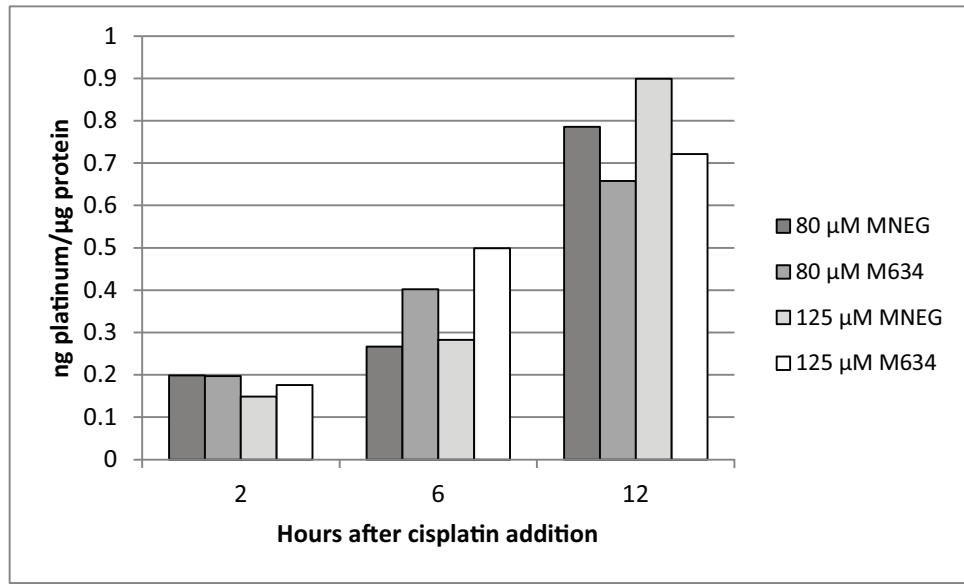

Supplementary figure 3

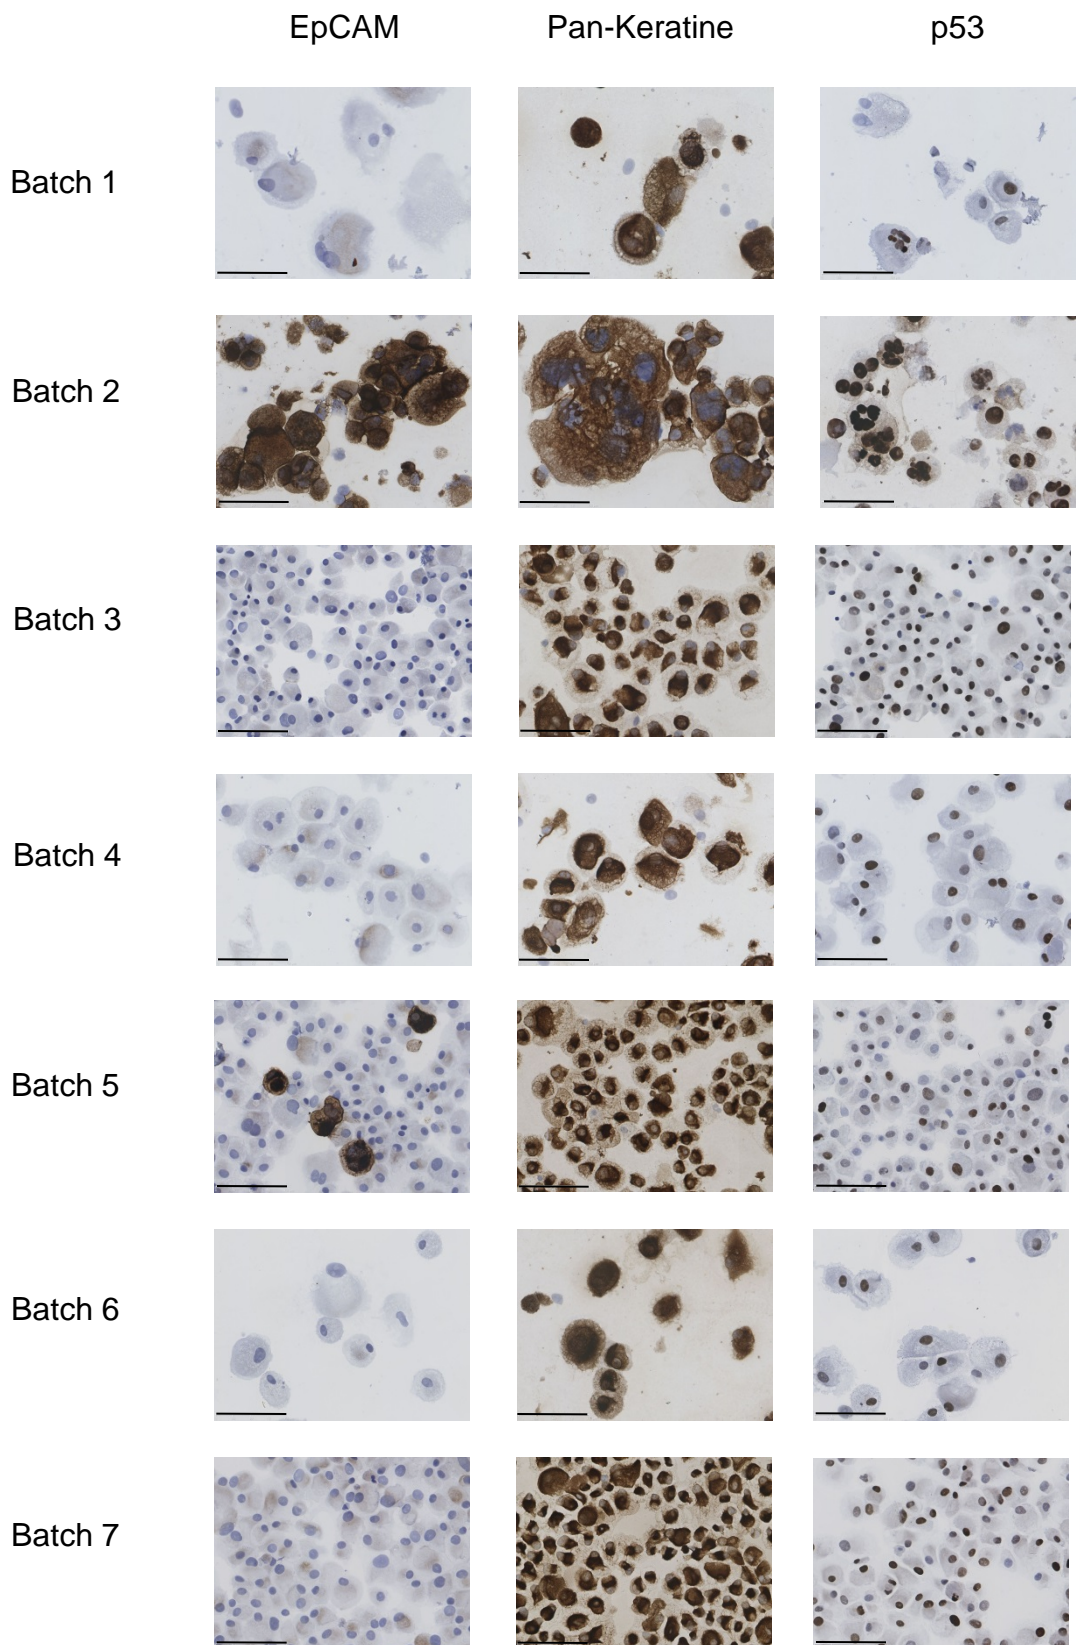

# Supplementary figure 4

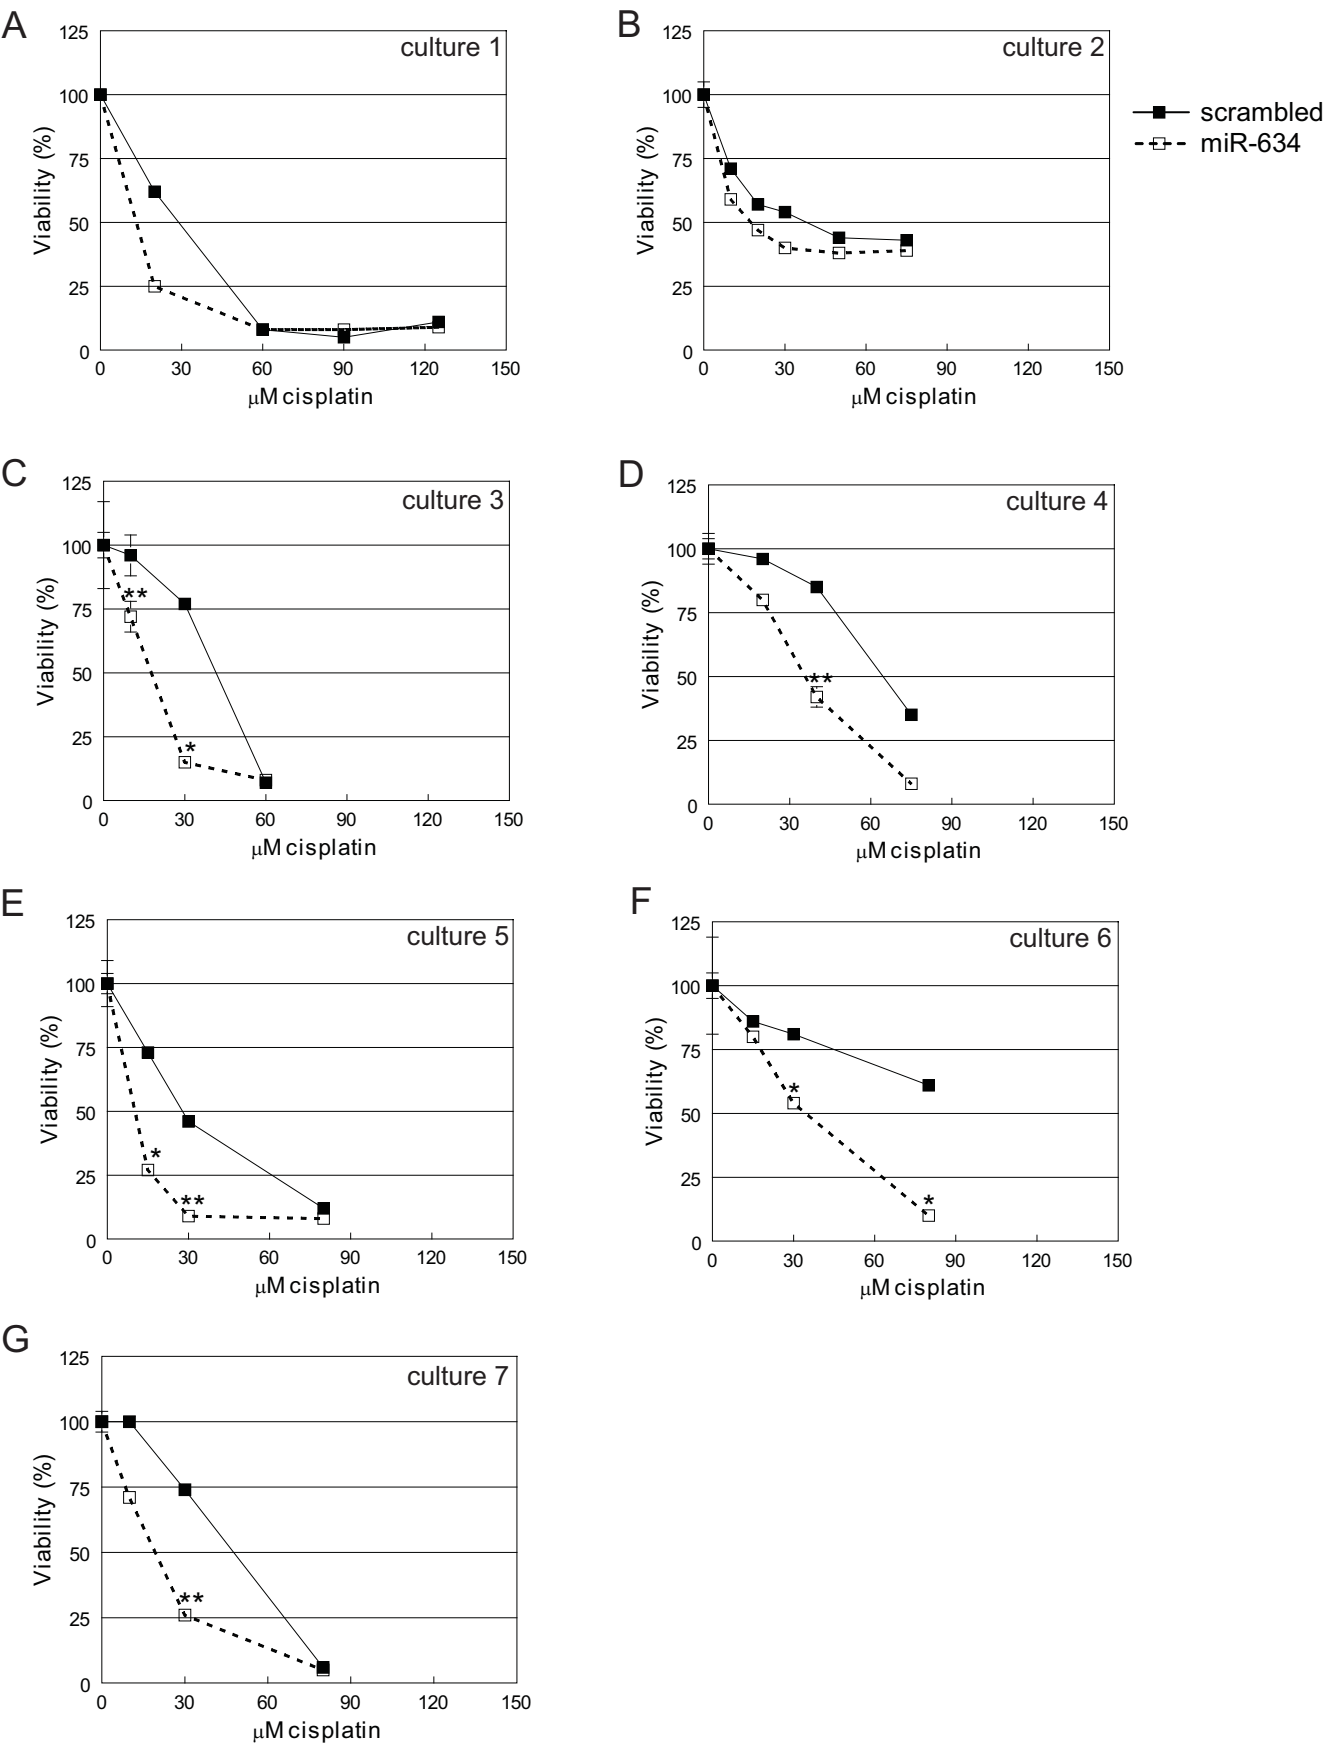

# Supplementary figure 5

**A**

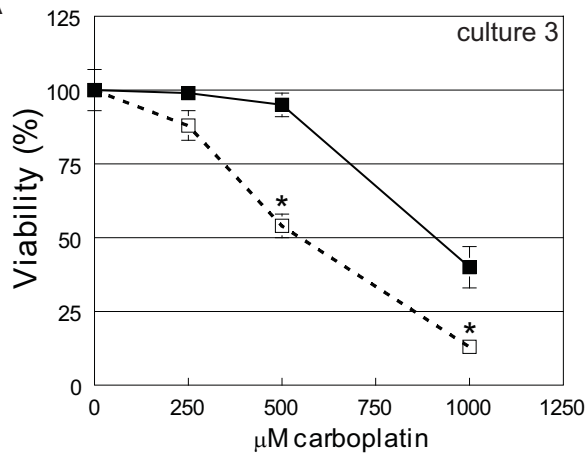

**B**

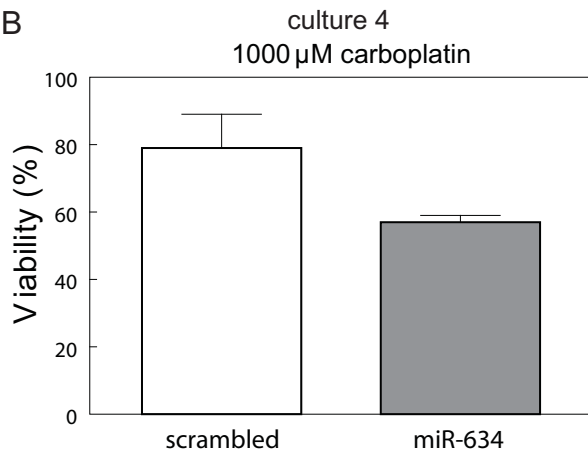

**C**

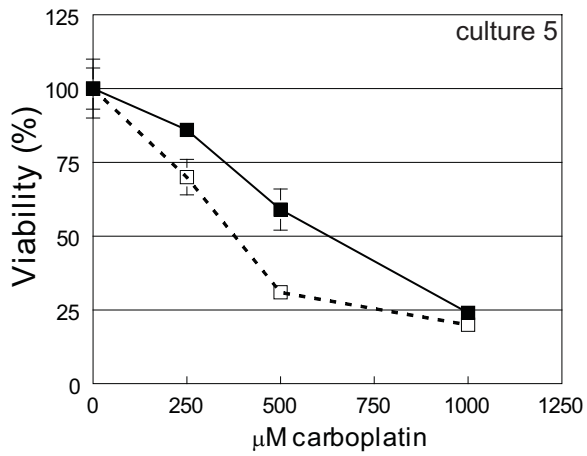

**D**

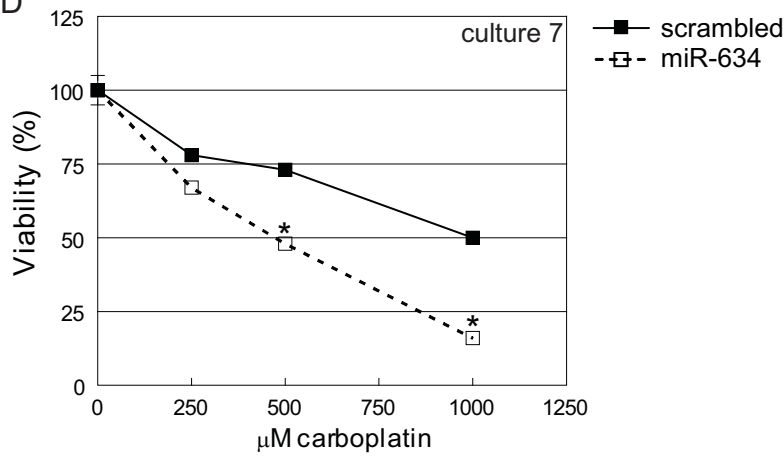

# Supplementary figure 6

A

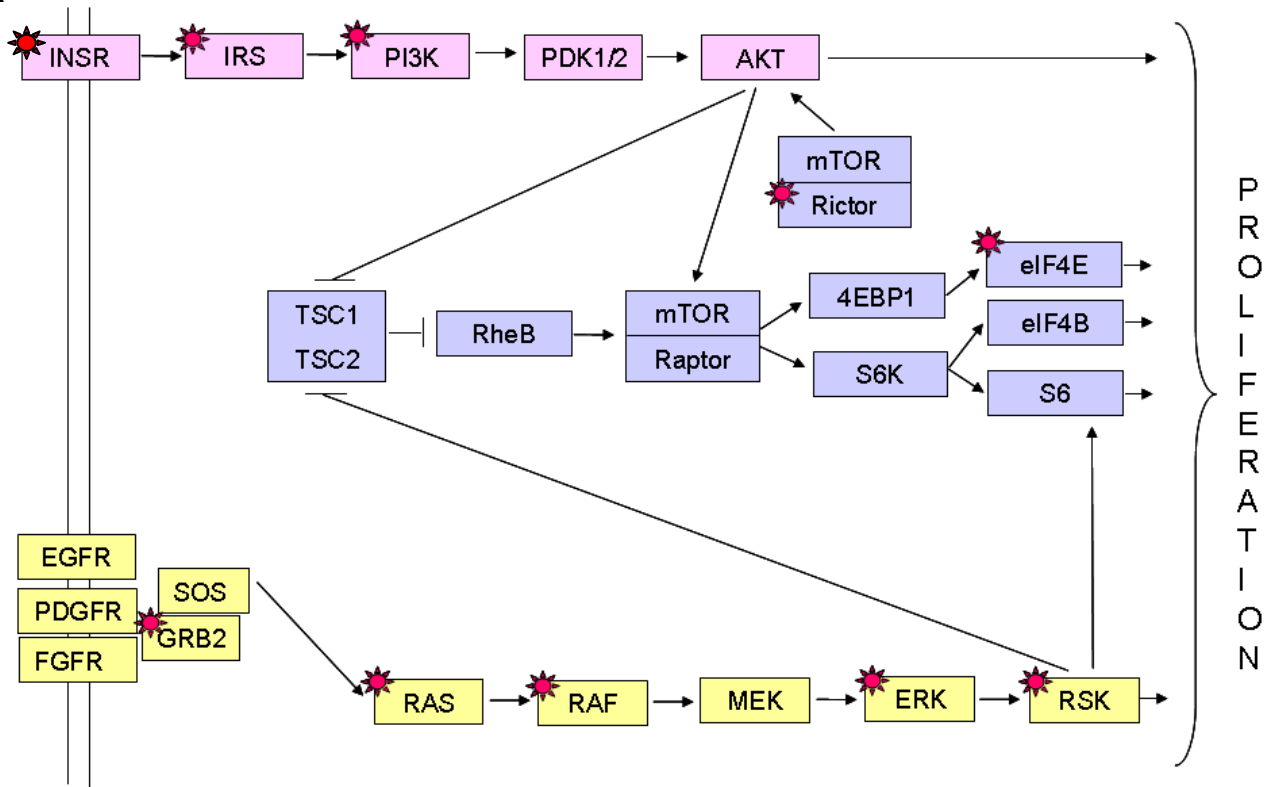

B

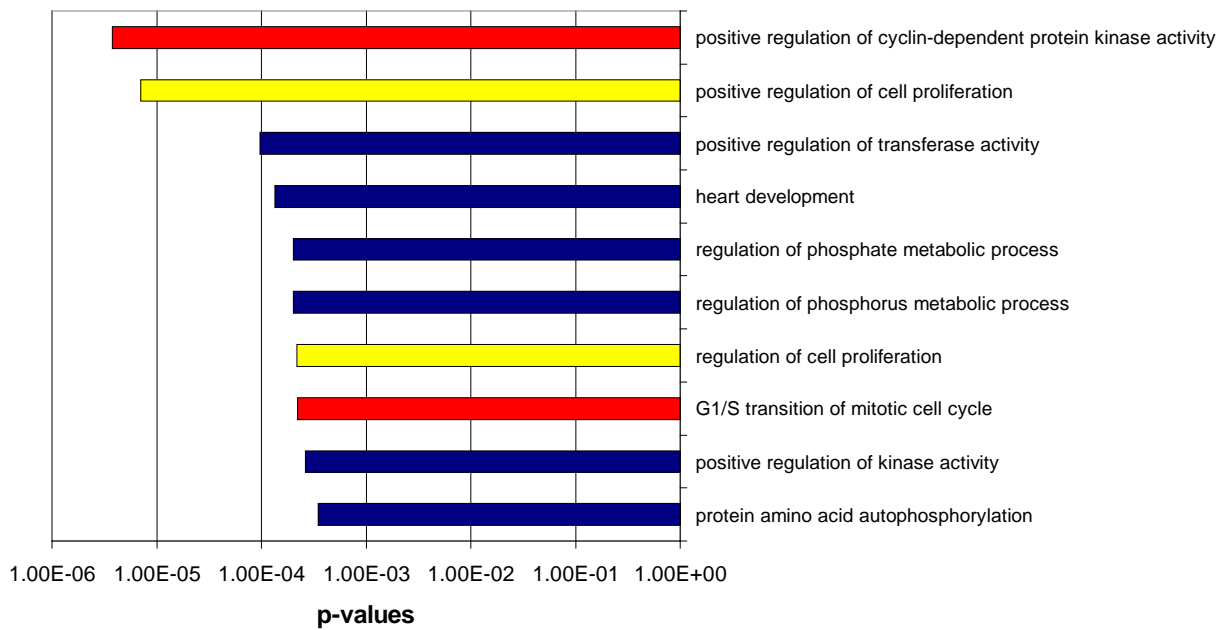

# Supplementary figure 7

A

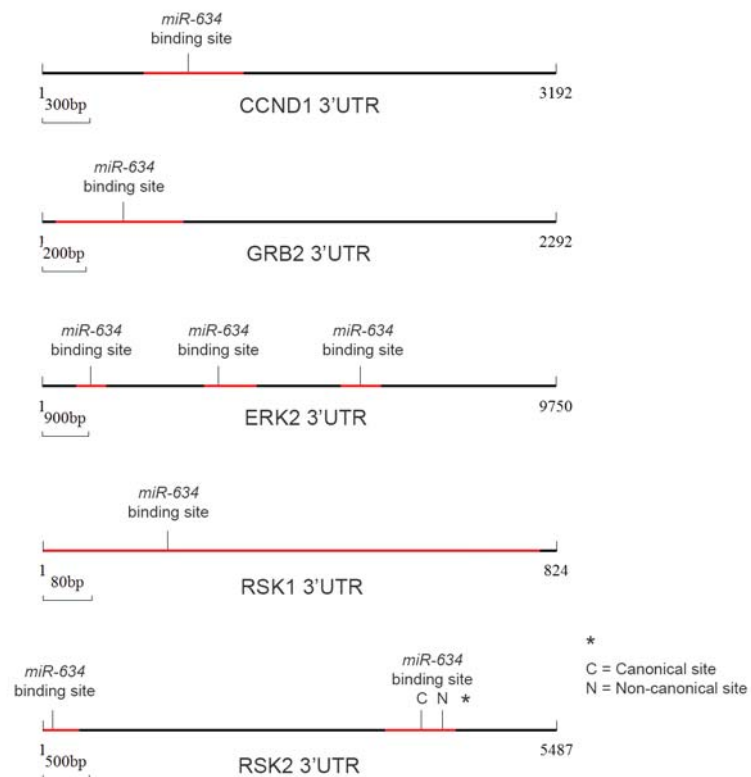

B

|       | 3'UTR length | Construct | position | miR-634 site | FW primer                       | RV primer | Mutant                                 | Mutant primer sense | Mutant primer antisense                                         |                                                                  |
|-------|--------------|-----------|----------|--------------|---------------------------------|-----------|----------------------------------------|---------------------|-----------------------------------------------------------------|------------------------------------------------------------------|
|       |              |           | position | sequence     | position                        | sequence  |                                        |                     |                                                                 |                                                                  |
| CCND1 | 3192         | CCND1     | 908      | 632          | 5'CGCTCGAGCCTCTTCCATCTTATCATG   | 1229      | 5'ATGCGGCCGCGGAAAGGAACCTATCATCC        | CCND1_mut           | 5'-gtgacctgttatgagatccgggtttctaccaacggcct-3'                    | 5'-aggccggtggtagaaaaccgggatctcataaacaggtcac-3'                   |
| GRB2  | 2292         | GRB2      | 361      | 64           | 5'CGCTCGAGCACAAAGCTGCCTCTGACAG  | 610       | 5'ATGCGGCCGCGCAGGTGGGCTTCTCAGG         | GRB2_mut            | 5'-taataaaaaacaagaaaccaagtgccgggatctctctatgcaaaatgtctgtt-3'     | 5'-aacagacatttgcatagagaaatccgggccactggttctgttttatta-3'           |
| ERK2  | 9750         | ERK2_1    | 917      | 650          | 5'CGCTCGAGCCCAGCTTTAGAAAATGC    | 1197      | 5'ATGCGGCCGCTCCAACACAGTTAGTGC          | ERK2_1_mut          | 5'-cagggtggaactccaatccgggcatatacgccc-3'                         | 5'-ggcgatatacgccgggatgtggatgccaccctg-3'                          |
|       |              |           | 3352     | 3076         | 5'CGCTCGAGAGCCATTGAGGAAACTG     | 4045      | 5'ATGCGGCCGCTCACAGCCCTAACACAAG         | ERK2_2_mut          | 5'-tatacatltaaagcatgtgtcttaaagtgttatccgggtttgaaacatgatactctg-3' | 5'-caggagatcatgtttcaaacccgggataacaatltaaagcaaaatgctttaaagtata-3' |
|       |              |           | 6034     | 5670         | 5'CGCTCGAGCGGACATGATAGAGCG      | 6414      | 5'ATGCGGCCGCGGAAACCCACAGAAACATC        |                     |                                                                 |                                                                  |
| RSK1  | 824          | RSK1      | 201      | 1            | 5'CGCTCGAGGGCACACAGGGCATTCCGG   | 773       | 5'ATGCGGCCGCGCATGGACAGATGAACCTGAGTAAAC |                     |                                                                 |                                                                  |
| RSK2  | 5487         | RSK2_1    | 106      | 1            | 5'CGCTCGAGAGTGACCTCAGTGAGATATTG | 369       | 5'ATGCGGCCGCGCTTAACATAAACTGTCCATCC     | RSK2_1_mut          | 5'-ctgcaagcacaactgtcccaaccgggacccataatgc-3'                     | 5'-gcattatgggtccgggtgggacagtgctgtctgcag-3'                       |
|       |              |           | 4043     | 3661         | 5'CGCTCGAGCTGGCCTTAAAAATGACC    | 4391      | 5'ATGCGGCCGCGCTCGGTATGCCCTGTTATG       | RSK2_2_mut_1        | 5'-tcaaccccaggttgcttaacatccgggctcccaagtgac-3'                   | 5'-gtcacttgggagccgggaaagtgaagcaacctgggtga-3'                     |
|       |              |           | 4267     |              |                                 |           |                                        | RSK2_2_mut_2        | 5'-gtattctgtgtgataagtgattgcaaccgggtccaatgtgactgag-3'            | 5'-ctcagtcacattggaaccgggtgcaaatcacttgatcacagaaatc-3'             |

Indicated in red is the XhoI site that is added via PCR amplification

Indicated in red is the NotI site that is added via PCR amplification

Indicated in red is the miR-634 target site mutated to a Small site

Indicated in red is the miR-634 target site mutated to a Small site



Supplementary figure 8

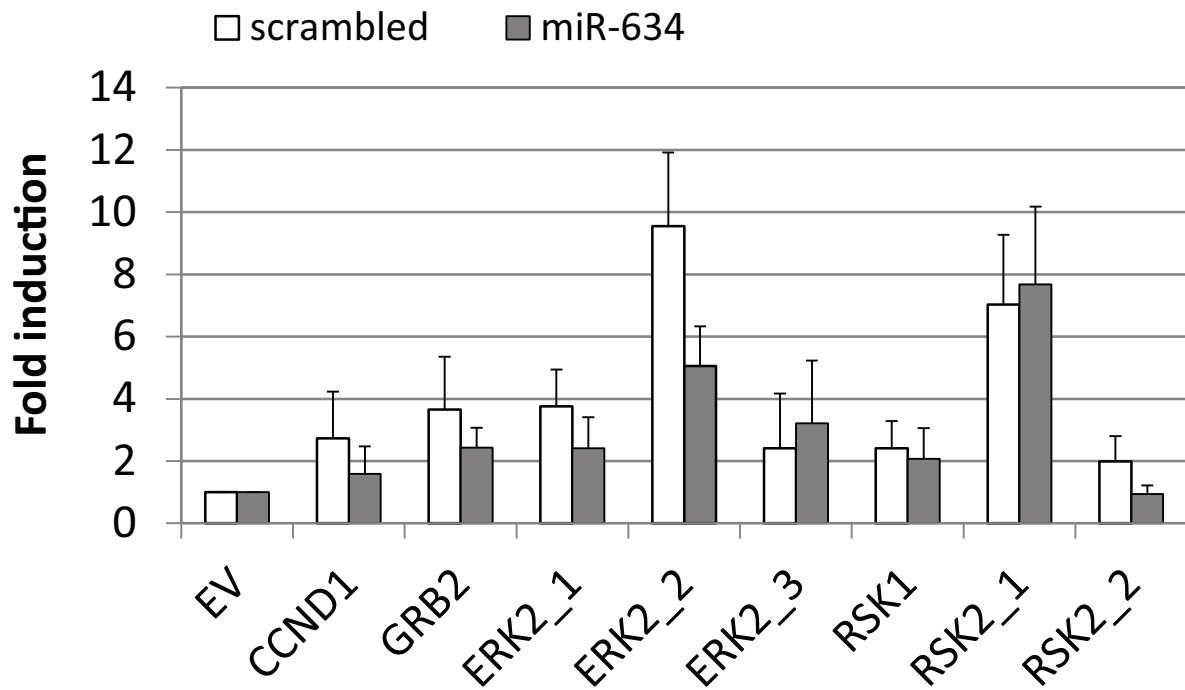

Supplementary figure 9

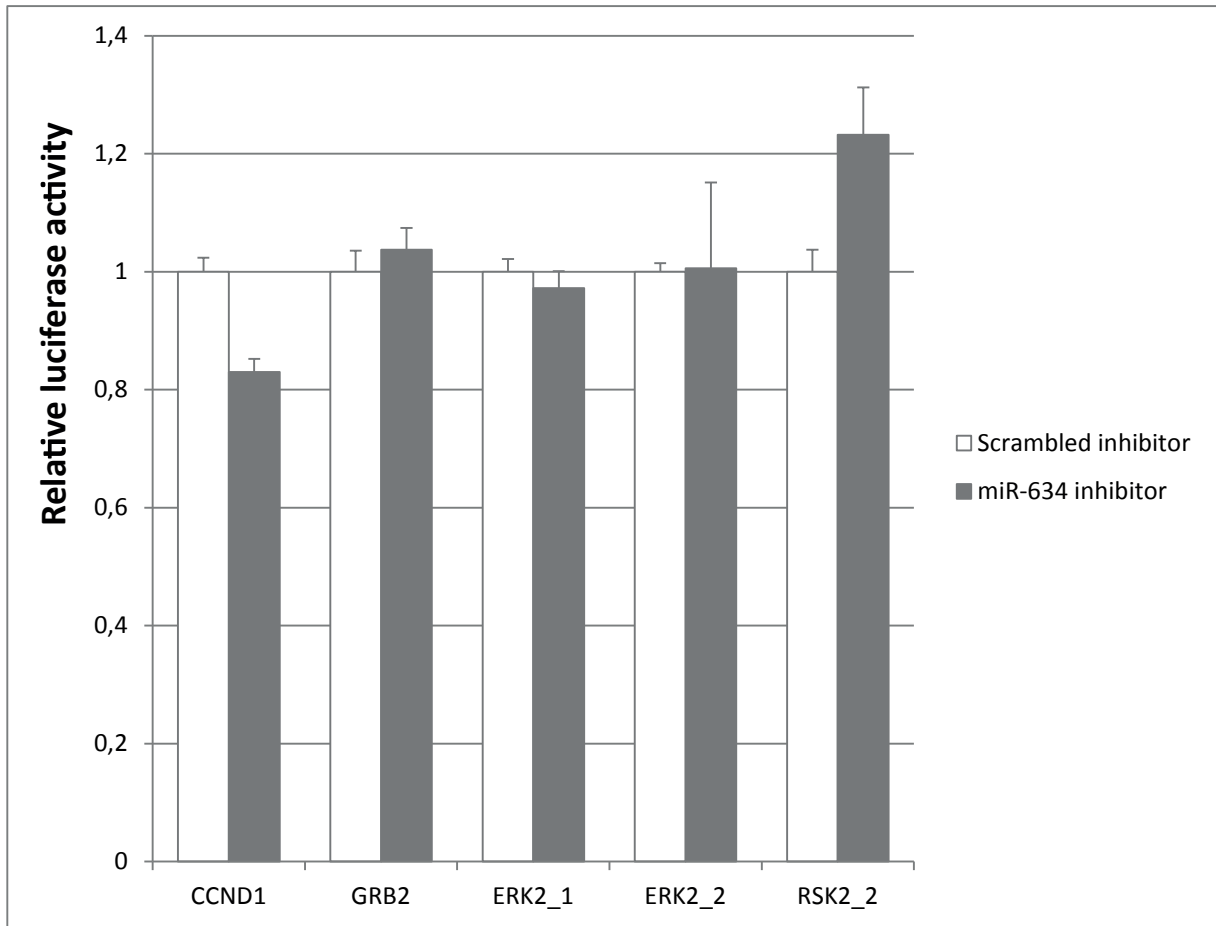

Supplementary figure 10

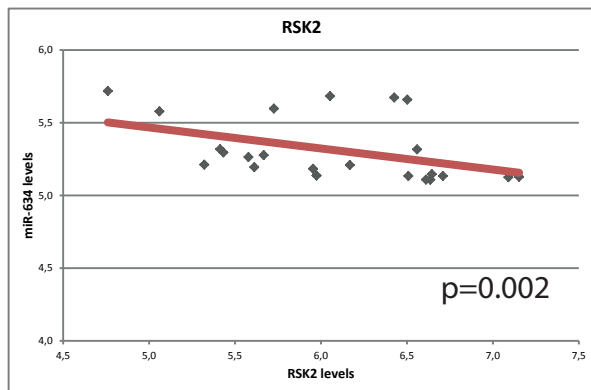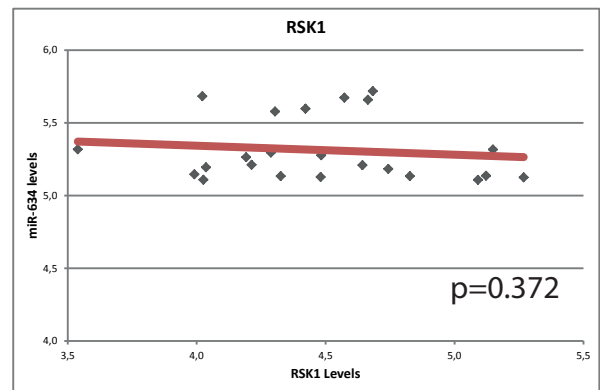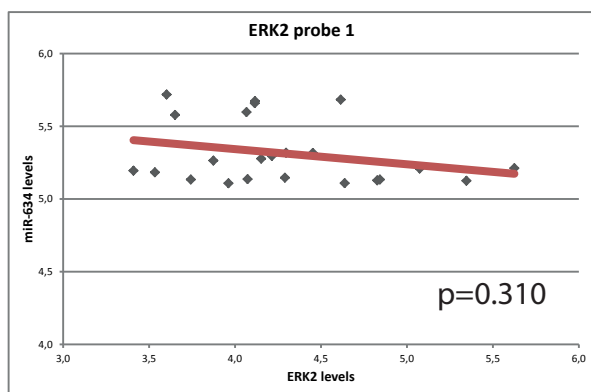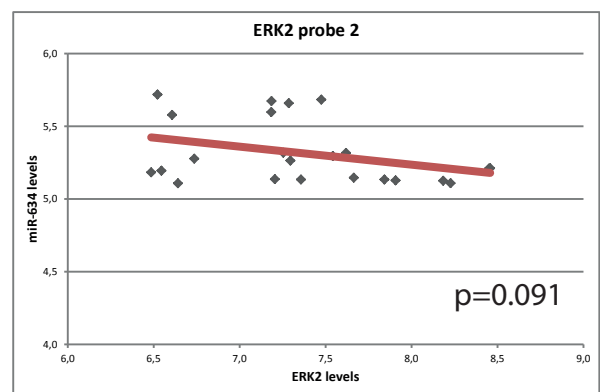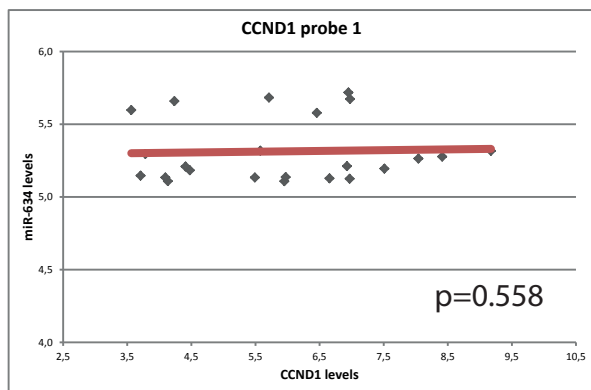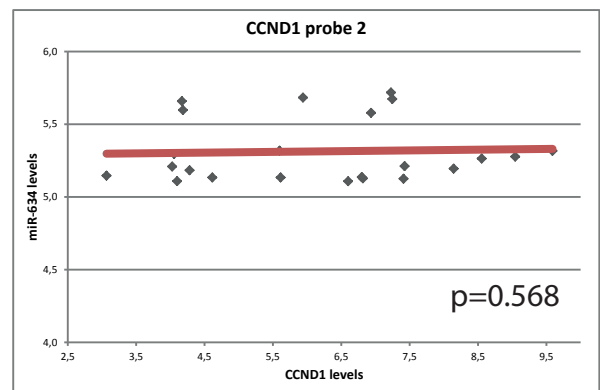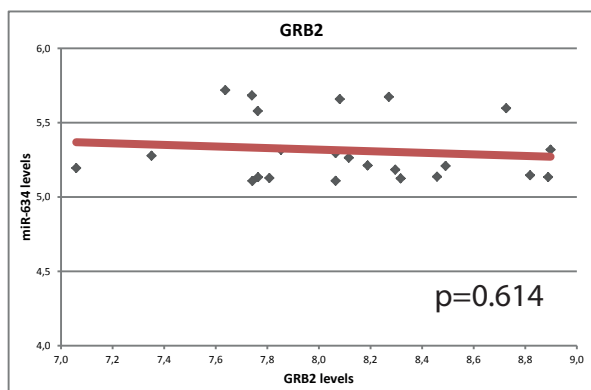

# Supplementary figure 11

## A

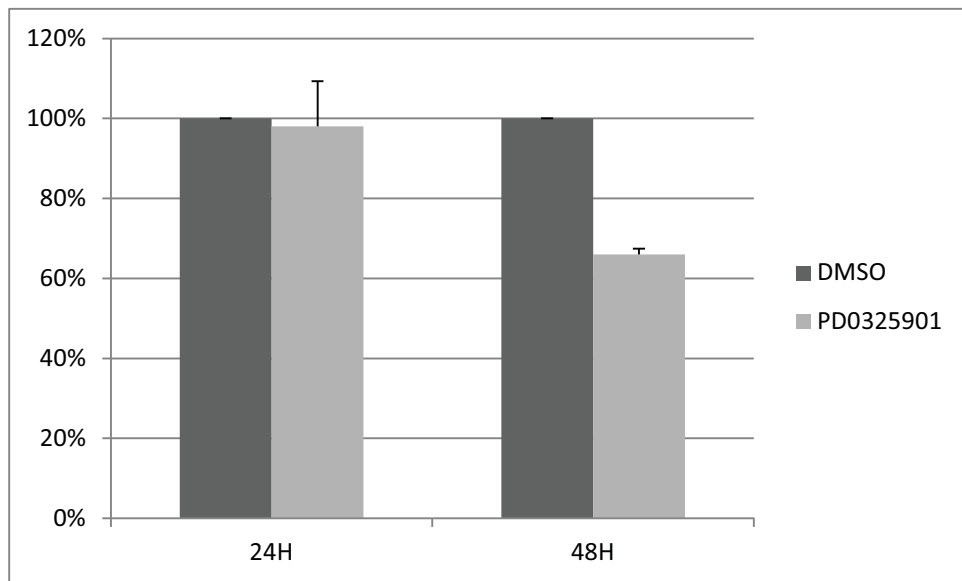

## B

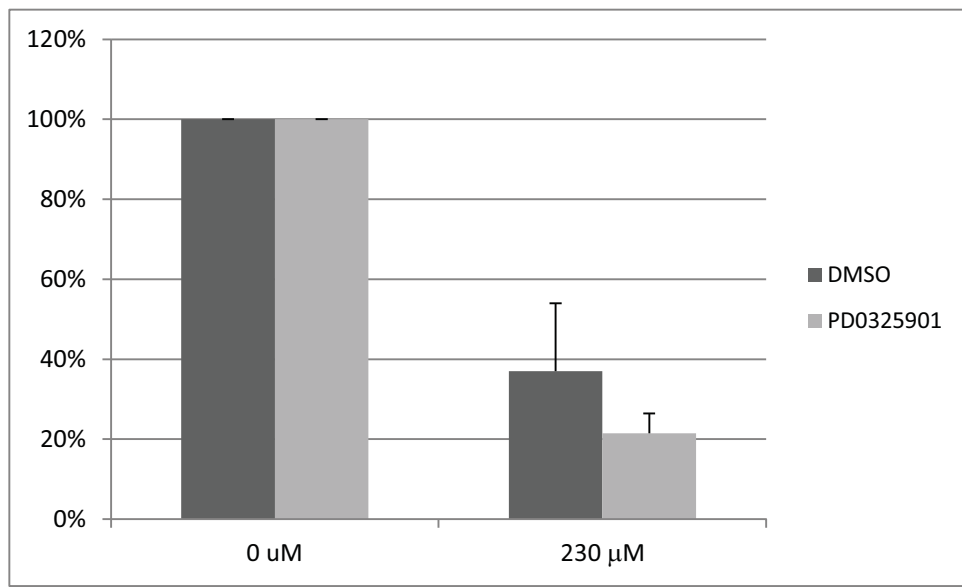

Supplementary figure 12

A.

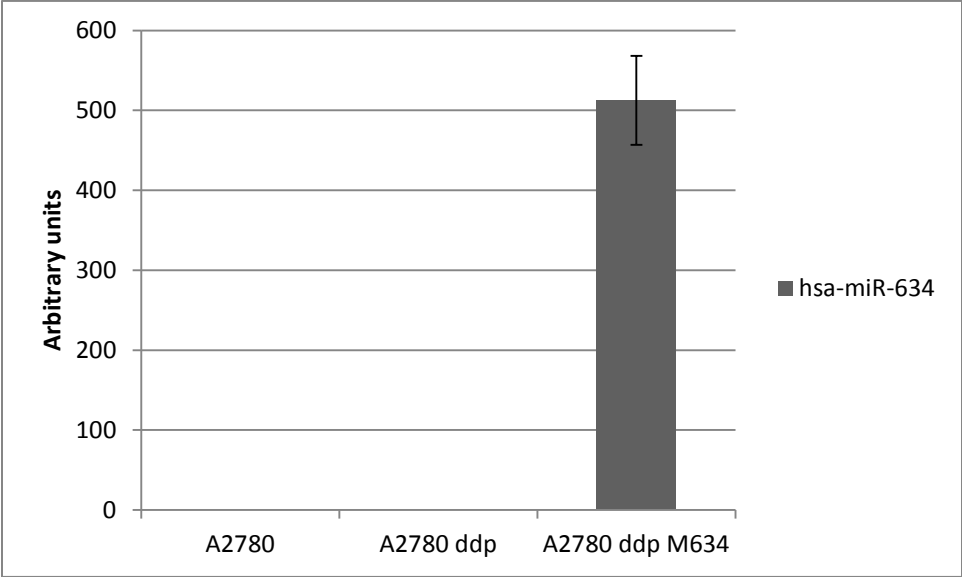

B.

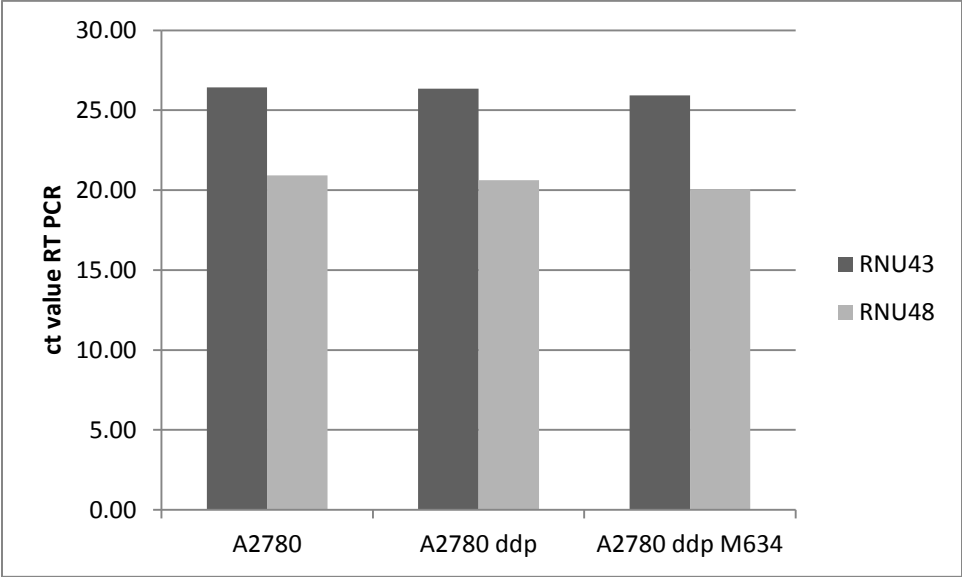

Supplement: 12943_2015_464_MOESM1_ESM.pdf [file 12943_2015_464_MOESM1_ESM.pdf]
